# Supplementary material for: New strategy for synthesis of hydroxyl-terminated poly(3-hexylthiophene) and its block copolymer using an η3-π-allyl hydroxyl-functionalized Ni(i) initiator
Source: Royal Society of Chemistry journal article supplement (doi:10.1039/d0ra07773a), 2020-01-01
Supplement: d0ra07773a1.pdf [file d0ra07773a1.pdf]

## Supporting Information

### Measuring method of hydroxyl value

The specific experimental method as follow: Phthalic anhydride 35 g is dissolved in 250 ml pyridine (called acetylated mixture solution). After 24 h, some samples is accurately weighed, and 8 ml acetylated mixed solution was added, then refluxing at 115°C for 1h, then 8 ml pyridine and 16 ml water are added from the top of the condensation tube, continue to react for 15min, then titration is operated by KOH solution (0.5mol/L in water), phenolphthalein is indicator. hydroxyl value= $(0.5(V_1 - V_2)M_n)/1000m$ ,  $V_1$ = titrant's volume of blank sample,  $V_2$ = titrant ' s volume of experimental sample,  $m$ = weight of experimental sample.  $M_n$ = measured molecular weight by SEC.

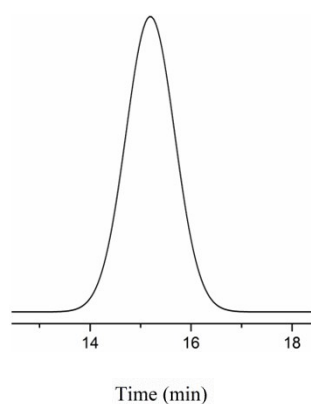

**Figure S1 GPC curve of hydroxyl functionalized P3HT,  $M_n=1673\text{g/mol}$ ,  $M_w/M_n=1.04$**

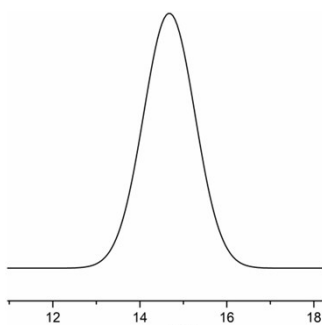

Figure S2 GPC curve of hydroxyl functionalized PS,  $M_n = 5314$  g/mol,  $M_w/M_n = 1.08$

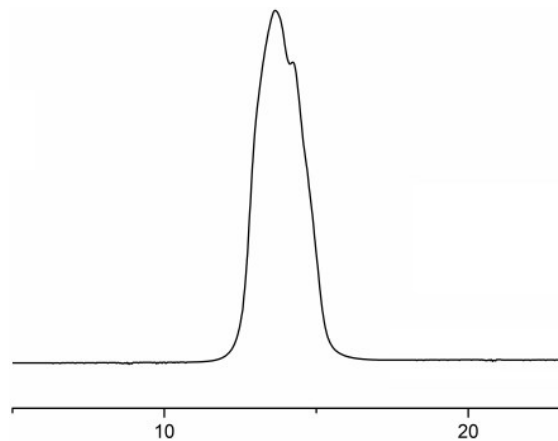

Figure S3 GPC curve of hydroxyl functionalized PB,  $M_n = 14123$  g/mol,  $M_w/M_n = 1.03$

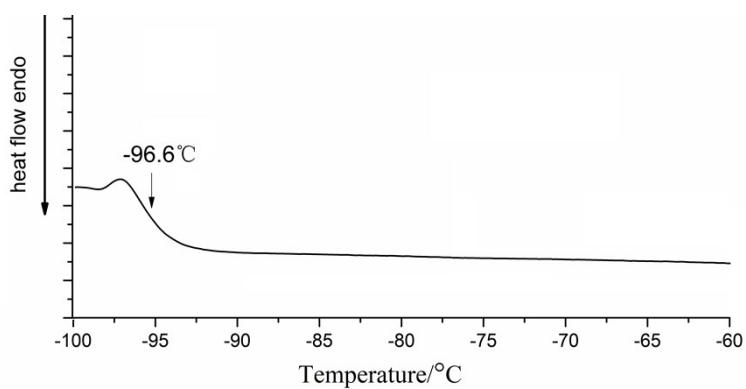

Figure S4 DSC data of hydroxy-terminated PB

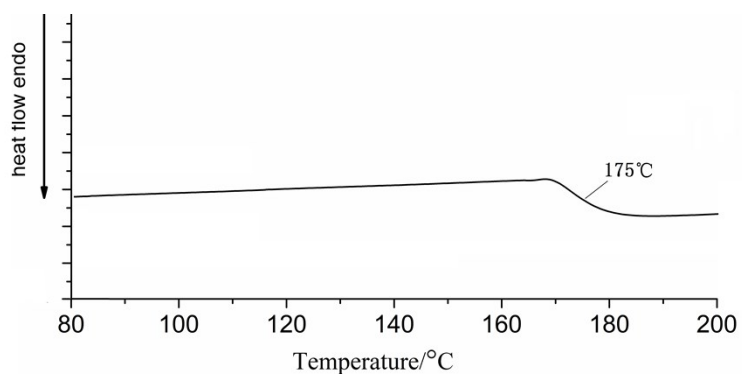

Figure S5 DSC curve of hydroxy-terminated P3HT

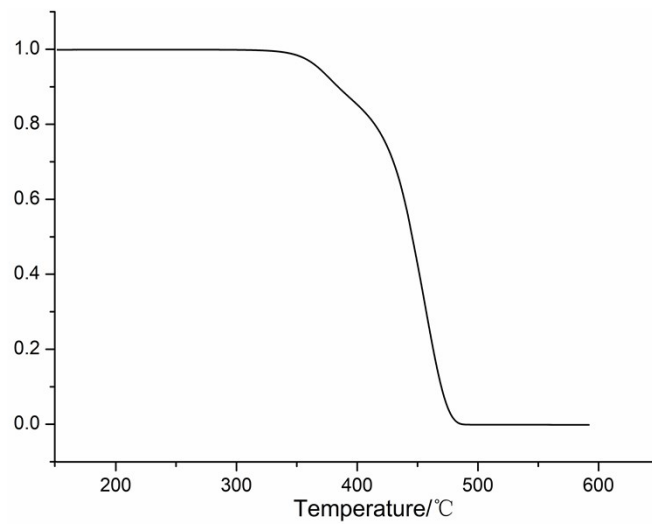

**Figure S6 TGA spectrum of hydroxy-terminated PB**

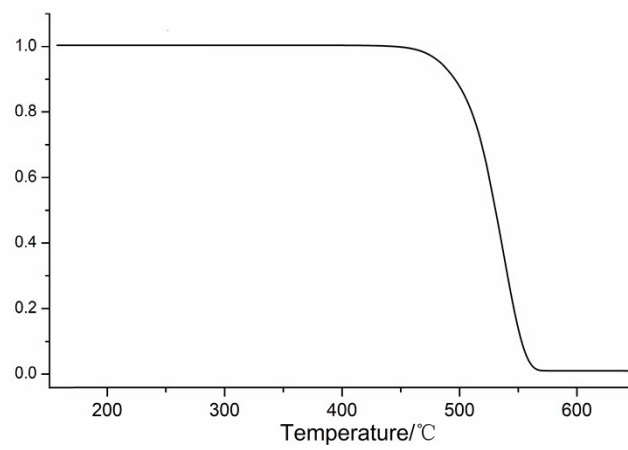

**Figure S7 TGA spectrum of hydroxy-terminated P3HT**

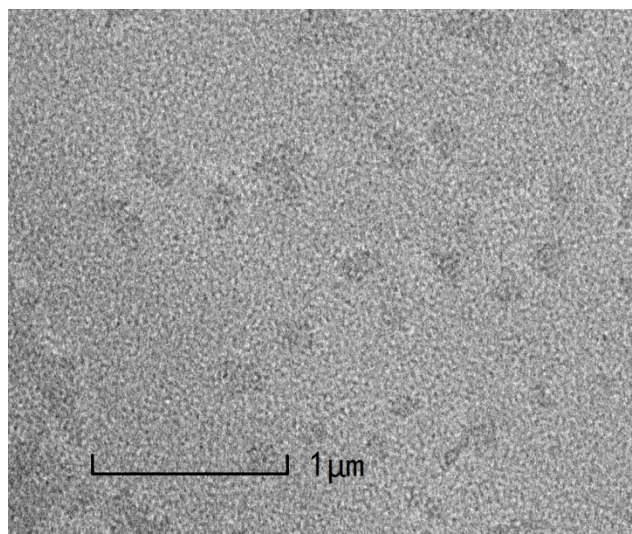

**Figure S8 TEM of PB-b-P3HT block copolymer**
